# Supplementary material for: MET amplification assessed using optimized FISH reporting criteria predicts early distant metastasis in patients with non-small cell lung cancer
Source: PubMed Central journal article supplement (PMC5849187; doi:10.18632/oncotarget.24430), 2018-02-07
Supplement: oncotarget-09-12959-s001.pdf [file oncotarget-09-12959-s001.pdf]

# **MET amplification assessed using optimized FISH reporting criteria predicts early distant metastasis in patients with non-small cell lung cancer**

## **SUPPLEMENTARY MATERIALS**

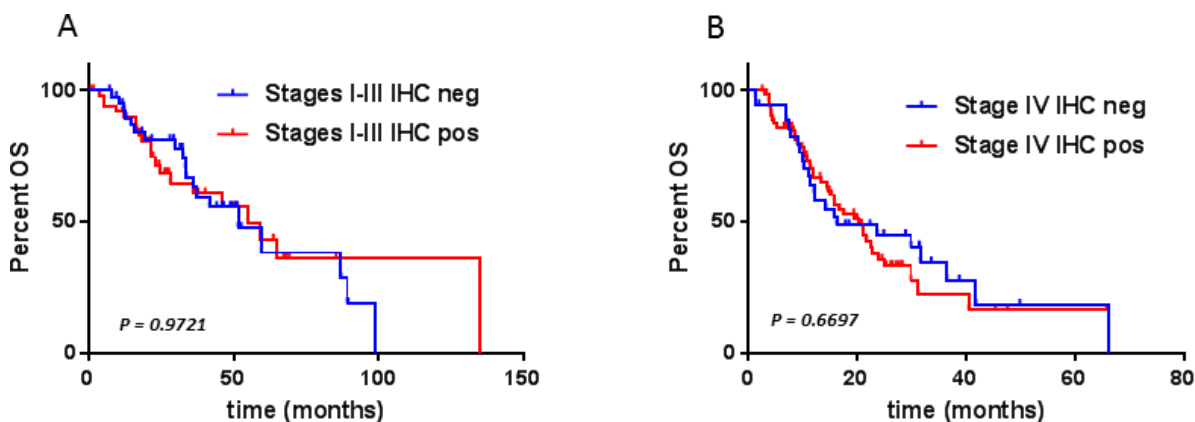

**Supplementary Figure 1: Kaplan-Meier curves comparing overall survival (OS) by MET IHC status. (A)** Comparison of OS in patients with (pos, positive) and without (neg, negative) MET overexpression in the stages I-III NSCLC group; **(B)** Comparison of OS in patients with (pos, positive) and without (neg, negative) MET overexpression in the stage IV NSCLC group.

Supplementary Table 1: *MET* copy number distribution according to optimized and historic criteria\*

| Optimized reporting criteria       | No. of patients (%) (N = 384) |                |                |
|------------------------------------|-------------------------------|----------------|----------------|
|                                    | <i>MET</i> neg                | <i>MET</i> cng | <i>MET</i> amp |
|                                    | 338 (88.0)                    | 17 (4.4)       | 29 (7.6)       |
| <b>Historic reporting criteria</b> |                               |                |                |
| <i>MET</i> -negative               |                               |                |                |
| <i>MET</i> CN < 3                  | 273 (71.1)                    | 0              | 0              |
| <i>MET</i> CN ≥ 3 to < 4           | 65 (16.9)                     | 0              | 0              |
| <i>MET</i> CN ≥ 4 to < 5           | 0                             | 17 (4.4)       | 0              |
| <i>MET</i> CN ≥ 5                  | 0                             | 0              | 8 (2.1)        |
| <i>MET</i> -positive               |                               |                |                |
| <i>MET</i> /CEP7 ratio ≥ 2.0       | 0                             | 0              | 21 (5.5)       |

Abbreviations: *MET*, mesenchymal-epithelial transition factor; *MET* CN: *MET* copy number per cell, *MET*neg, *MET*-negative; *MET*cng, *MET* copy number gain; *MET*amp, *MET* amplification; CEP7, centromere probe of chromosome 7.

\*Both reporting criterion included those with “the *MET*/CEP7 ratio was < 2.0 but the *MET*-CN was ≥ 20 copies/cell or *MET* signal clusters were seen in more than 10% of tumor cells”.

Supplementary Table 2: Comparison of overall survival by *MET* status in patients with stages I-III NSCLC

| Five-Group <i>MET</i> Classification  | No. of Patients | OS1 <sup>a</sup> (Months) | P1 <sup>b</sup> | P2 <sup>c</sup> | Optimized <i>MET</i> Categories | OS2 <sup>d</sup> (Months) | P3 <sup>e</sup> |
|---------------------------------------|-----------------|---------------------------|-----------------|-----------------|---------------------------------|---------------------------|-----------------|
|                                       |                 |                           |                 |                 | <i>MET</i> neg                  | 51.6                      | Ref.            |
| <i>MET</i> CN < 3 (Group1)            | 121             | 48.9                      | .034*           | Ref.            |                                 |                           |                 |
| <i>MET</i> CN ≥ 3 to < 4 (Group2)     | 32              | 59.1                      | .005*           | .321            |                                 |                           |                 |
|                                       |                 |                           |                 |                 | <i>MET</i> cng                  | 134.4                     | .106            |
| <i>MET</i> CN ≥ 4 to < 5 (Group3)     | 10              | 134.4                     | .003*           | .063            |                                 |                           |                 |
|                                       |                 |                           |                 |                 | <i>MET</i> amp                  | 28.1                      | .036*           |
| <i>MET</i> CN ≥ 5 (Group4)            | 2               | 28.1                      | .782            | .623            |                                 |                           |                 |
| <i>MET</i> /CEP7 ratio ≥ 2.0 (Group5) | 5               | 23.6                      | Ref.            | .034*           |                                 |                           |                 |

Abbreviations: *MET*, mesenchymal-epithelial transition factor; *MET* CN: *MET* copy number per cell; OS, overall survival; *MET*amp, *MET* amplification; *MET*cng, *MET* copy number gain; *MET*neg, *MET*-negative; CEP7, centromere probe of chromosome 7.

<sup>a</sup>OS1: OS according to the 5-group *MET* classification. <sup>b</sup>P1: *P* value for the 5-group classification with *MET*/CEP7 ratio ≥ 2.0 as the reference category.

<sup>c</sup>P2: *P* value for the 5-group classification with *MET*CN < 3 as the reference category.

<sup>d</sup>OS2: OS according to the optimized *MET* categories.

<sup>e</sup>P3: *P* value in the optimized categories with *MET*neg as the reference category. \* Indicates statistically significant result (*P* < .05).

Supplementary Table 3: Comparison of *MET* parameters by disease stage

| <i>MET</i> Parameter                 | Overall          | Stage I-III       | Stage IV         | <i>P</i> Value |
|--------------------------------------|------------------|-------------------|------------------|----------------|
| <i>MET</i> FISH Quantity             |                  |                   |                  |                |
| Mean <i>MET</i> -CN per cell (range) | 3.13 (1.48-20.5) | 2.83 (1.50-13.68) | 3.36 (1.48-20.5) | .042*          |
| Mean CEP7 per cell (range)           | 2.65 (1.37-9.6)  | 2.64 (1.65-7.48)  | 2.67 (1.37-9.60) | .743           |
| Mean <i>MET</i> /CEP7 ratio(range)   | 1.15 (0.5-8.5)   | 1.06 (0.50-2.28)  | 1.21 (0.68-8.50) | .016*          |
| <i>MET</i> FISH Categories           |                  |                   |                  |                |
| <i>MET</i> neg, n (%)                | 338              | 153 (90.0)        | 185 (86.4)       | .038*          |
| <i>MET</i> cng, n (%)                | 17               | 10 (5.9)          | 7 (3.3)          |                |
| <i>MET</i> amp, n (%)                | 29               | 7 (4.1)           | 22 (10.3)        |                |

Abbreviations: *MET*, mesenchymal-epithelial transition factor; *MET* CN: *MET* copy number per cell; CEP7, centromere probe of chromosome 7; FISH, fluorescence *in situ* hybridization; *MET*neg, *MET*-negative; *MET*cng, *MET* copy number gain; *MET*amp, *MET* amplification. \* Indicates statistically significant result ( $P < .05$ , Fisher exact test or *t* test).

Supplementary Table 4: Overall survival and patient clinicopathological characteristics

| Characteristic         | No. of Patients | Median OS (months) | P Value |
|------------------------|-----------------|--------------------|---------|
| Age (years)            |                 |                    | .184    |
| ≤ 64                   | 199             | 34.8               |         |
| > 64                   | 185             | 30.9               |         |
| Sex                    |                 |                    | .575    |
| Male                   | 184             | 29.9               |         |
| Female                 | 200             | 36.0               |         |
| Race/ethnicity         |                 |                    | .450    |
| White                  | 305             | 32.1               |         |
| Non-white <sup>a</sup> | 72              | 31.6               |         |
| Histology              |                 |                    | <.001*  |
| Adenocarcinoma         | 338             | 34.8               |         |
| Others <sup>b</sup>    | 46              | 24.7               |         |
| Stage                  |                 |                    | <.001*  |
| I-III                  | 170             | 51.6               |         |
| IV                     | 214             | 19.5               |         |

<sup>a</sup> Non-white included 25 black, 24 Hispanic, and 23 Asian patients. Seven patients with unknown race were excluded from the analysis.

<sup>b</sup> Others included 40 patients with squamous cell carcinoma, 5 patients with unclassified non-small cell lung cancer, and 1 patient with adenosquamous carcinoma.

\* Indicates statistically significant result ( $P < .05$ ).

Supplementary Table 5: MET protein overexpression in patients with different stages and MET copy number groups

|                | Total, N (%) | Stages, N (%)    |               | P Value     | MET-CN Status, N (%) |                  |                  | P Value     |
|----------------|--------------|------------------|---------------|-------------|----------------------|------------------|------------------|-------------|
|                | N = 384      | I-III<br>N = 170 | IV<br>N = 214 |             | METneg<br>N = 338    | METcng<br>N = 17 | METamp<br>N = 29 |             |
| <b>MET-IHC</b> |              |                  |               | <b>0.14</b> |                      |                  |                  | <b>0.28</b> |
| negative       | 78 (20.3)    | 41 (24.1)        | 37 (17.3)     |             | 20 (20.7)            | 3 (17.7)         | 5 (17.2)         |             |
| positive       | 124 (32.3)   | 51 (30.0)        | 73 (34.1)     |             | 102 (30.2)           | 5 (29.4)         | 17 (58.6)        |             |
| not available  | 182 (47.4)   | 78 (45.9)        | 104 (48.6)    |             | 166 (49.1)           | 9 (52.9)         | 7 (24.1)         |             |

Abbreviations: MET, mesenchymal-epithelial transition factor; MET CN: MET copy number per cell, METneg, MET-negative; METcng, MET copy number gain; METamp, MET amplification; IHC, immunohistochemistry.
